# Supplementary material for: Characterization of mcr-1-Harboring Plasmids from Pan Drug-Resistant Escherichia coli Strains Isolated from Retail Raw Chicken in South Korea
Source: PubMed Central journal article supplement (PMC6780365; doi:10.3390/microorganisms7090344), 2019-09-12
Supplement: microorganisms-07-00344-s001.pdf [file microorganisms-07-00344-s001.pdf]

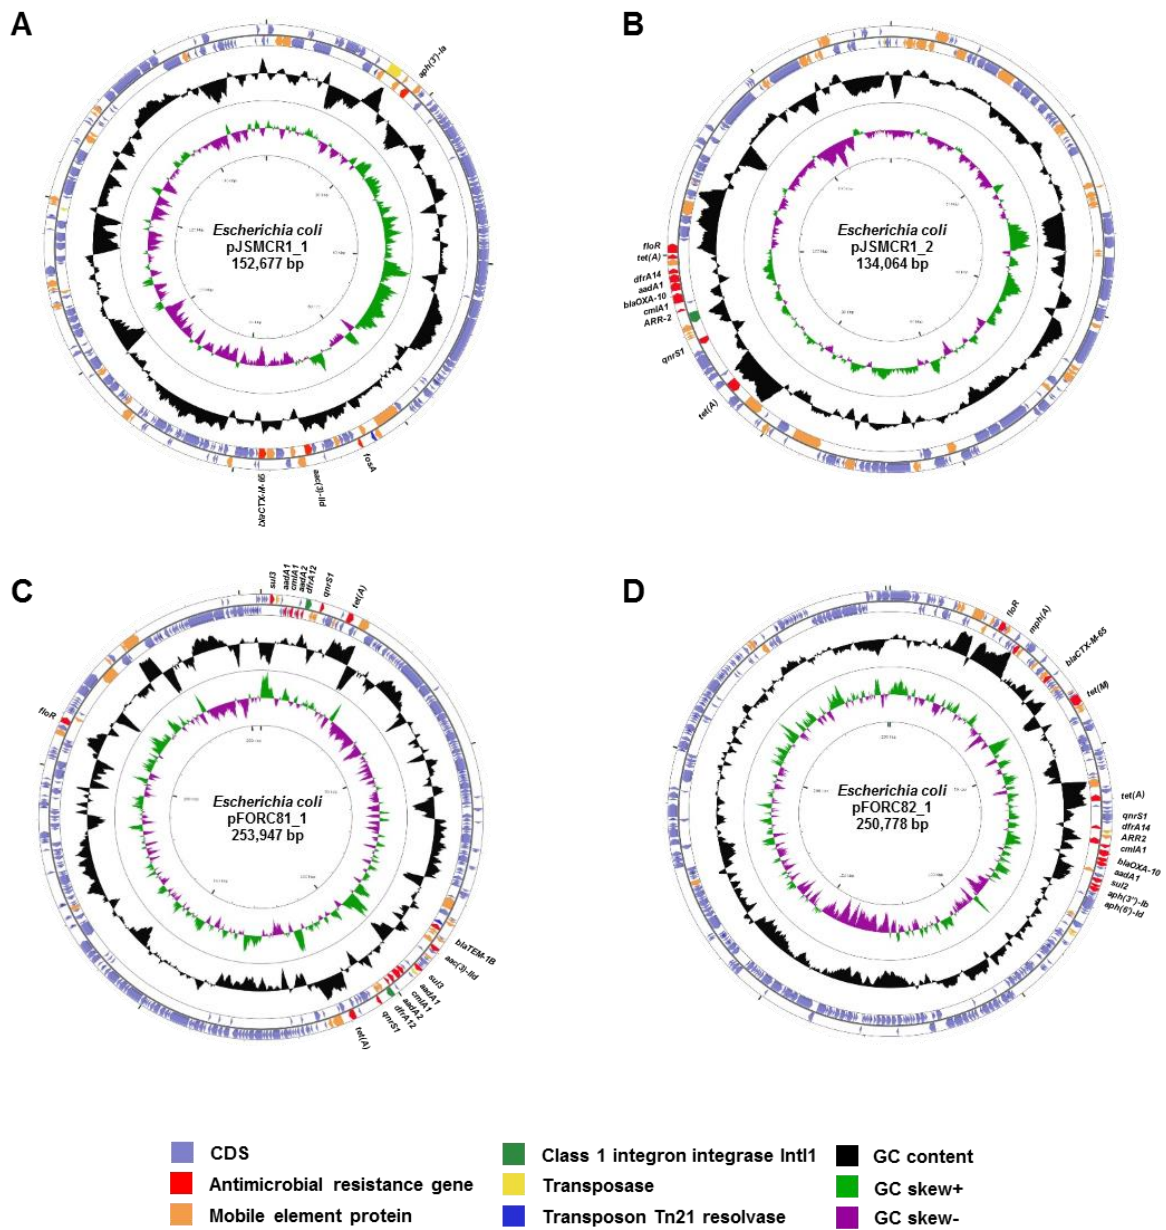

**Fig. S1.** Circular map of plasmid pJSMCR1\_1 (A), pJSMCR1\_2 (B), pFORC81\_1 (C), and pFORC82\_1 (D). Functions are color coded as explained in the key. GC content and GC Skew are represented on the distance scale (in Kbp) on the inner map.
